# Supplementary material for: Control of nitrosamines during non-potable and de facto wastewater reuse with medium pressure ultraviolet light and preformed monochloramine
Source: Royal Society of Chemistry journal article supplement (doi:10.1039/c6ew00044d), 2016-01-01
Supplement: c6ew00044d1.pdf [file c6ew00044d1.pdf]

Electronic Supplemental Information for:

Control of Nitrosamines During Non-Potable and *de Facto* Wastewater  
Reuse with Medium Pressure Ultraviolet Light and Preformed  
Monochloramine

*Daniel L. McCurry<sup>1</sup>, Stuart W. Krasner<sup>2</sup>, and William A. Mitch<sup>1,\*</sup>*

<sup>1</sup>Department of Civil and Environmental Engineering,  
Stanford University, Stanford, CA 94305

<sup>2</sup>Metropolitan Water District of Southern California  
La Verne, CA 91750

\*Corresponding author phone: (650) 725-9298; fax: (650) 723-7058;  
e-mail: [wamitch@stanford.edu](mailto:wamitch@stanford.edu)

**Table S1:** Nitrosamine GC/MS analytical details

| Compound                  | Retention Time (min) | Parent Ion | Quantification Ions |
|---------------------------|----------------------|------------|---------------------|
| <i>Internal Standards</i> |                      |            |                     |
| d6-NDMA                   | 14.12                | 81         | 49+50+63+64         |
| d8NMOR                    | 20.56                | 125        | 93+95               |
| <i>Analytes</i>           |                      |            |                     |
| NDMA                      | 14.16                | 75         | 44+47+58            |
| NMEA                      | 15.74                | 89         | 61                  |
| NDEA                      | 17.01                | 103        | 75                  |
| NDPA                      | 19.85                | 131        | 89                  |
| NPIP                      | 21.3                 | 115        | 69                  |
| NPYR                      | 20.93                | 101        | 55                  |
| NMOR                      | 20.59                | 117        | 86+87               |
| NDBA                      | 22.75                | 159        | 57                  |
